## Dimethyl Hydantoin Formaldehyde: A new Water-soluble Resin for Use as a Mounting Medium

By H. F. STEEDMAN

(From the Department of Zoology, University of Glasgow)

### SUMMARY

Dimethyl hydantoin formaldehyde resin dissolved in water or in 70 ml ethyl alcohol + 30 ml water is put forward as a solution suitable for the mounting of insects, small crustacea, &c. Its chief advantage over other water-soluble resins is its high solubility in water, its excellent adhesion to glass, its low viscosity even in high percentage solutions, and its hardness on drying.

### PHYSICAL AND CHEMICAL DATA

Colour: water-white to pale amber.

Odour: faint.

Form: brittle lumps.

Molecular weight: 240-300.

Initial softening point: 59° C-80° C.

Free formaldehyde: approximately 0.3% in aqueous solution.

Solubility in water: solutions up to 80% may be prepared with ease and filtered.

pH of solution: 6.5-7.5.

Soluble in methanol, ethyl acetate, methyl ethyl ketone, methylene chloride. Insoluble in xylene, benzene, diethyl ether, carbon tetrachloride, trichloroethylene.

Supplied by Rex Campbell, 7 Idol Lane, London, E.C.3.

### HISTOLOGICAL DATA

Stained sections: unsuitable because the resin will ultimately wash out the stain.

Whole mounts: excellent for all arthropods, turbellaria, teased materials such as muscle fibres stained with gold chloride, &c. Such specimens may be mounted directly from water or from alcohol solutions, or from formaldehyde solutions.

Strength of solution: the resin may be dissolved in either pure water or in water and alcohol solutions. The pure water solutions show a tendency to develop moulds and the solution recommended is therefore made up with 70 ml ethyl alcohol + 30 ml water, or in phenol solution (5% aqueous).

|                              |       |               |
|------------------------------|-------|---------------|
| Refractive index: DMHF resin | 70 g  | } R.I. 1.457. |
| Distilled water              | 30 ml |               |
| DMHF resin                   | 70 g  | } R.I. 1.466. |
| 70% alcohol                  | 30 ml |               |
| Dry resin                    |       | R.I. 1.54.    |

Effect on tissues: solutions of dimethyl hydantoin formaldehyde keep tissues soft. The following solution may be used in tubes or bottles as a preserving fluid for insects, &c., until it is convenient to mount them on slides:

|                                 |       |
|---------------------------------|-------|
| dimethyl hydantoin formaldehyde | 50 g  |
| ethyl alcohol, 70%              | 50 ml |

Penetration of tissues: a whole *Daphnia* mounted from water is translucent within 10 h.

Drying of mounted preparations: this may be done by leaving the slides on the bench at room temperature, or by drying in an oven at about 40° C for 3 or 4 days. Heating above 40° C produces bubbles in the resin. With large whole mounts the resin remains soft for some time.

Tendency to retain water: the solutions dry to a hard mass which retains about 3–4% water. This prevents the resin becoming brittle and flaking away from the microscope slide.

#### PREPARATION OF SOLUTIONS

1. Grind the resin to a powder. A mincing machine such as is used for household purposes is most suitable for bulk work.

2. Take 70 or 80 g of the ground resin as required and add 30 ml or 20 ml of distilled water, or of 70% alcohol. Shake at times for 3–5 days until the resin is dissolved.

3. Filter through a Barcham Green 904 filter paper. The 70% resin solution will go through the paper quite readily.

4. Refilter. The total resin loss as a result of filtering is 6%.

5. If the solution is purely aqueous, add sufficient phenol to make a 5% solution. This is not necessary when the resin is dissolved in 70% alcohol.

For small thin mounts the 70% resin solution is recommended: for large thick specimens the 80% solution.

I am happy to acknowledge skilled technical assistance from Mr. Peter Anderson.
